# Supplementary material for: SCUBE1 Controls BMPR2-Relevant Pulmonary Endothelial Function: Implications for Diagnostic Marker Development in Pulmonary Arterial Hypertension
Source: PubMed Central journal article supplement — JACC Basic Transl Sci. 2020 Nov 4;5(11):1073–92. doi: 10.1016/j.jacbts.2020.08.010 (PMC7691287; doi:10.1016/j.jacbts.2020.08.010), 2020-11-04

## SUPPLEMENTAL APPENDIX

### SCUBE1 Controls BMPR2-Relevant Pulmonary Endothelial Function: Implications for Diagnostic Marker Development in Pulmonary Arterial Hypertension

Wei Sun, MD, Ying Tang, MS, Yi-Yin Tai, MS, Adam Handen, MS, Jingsi Zhao, MS, Gil Speyer, PhD, Yassmin Al Aaraj, MD, Annie Watson, MPH, Makenna E. Romanelli, John Sembrat, BS, Mauricio Rojas, MD, Marc A. Simon, MD, Yingze Zhang, PhD, Janet Lee, MD, Zeyu Xiong, MD, MS, Partha Dutta, DVM, PhD, Sathish Badu Vasamsetti, PhD, Dennis McNamara, MD, Bryan McVerry, MD, Charles F. McTiernan, PhD, Frank C. Sciruba, MD, Seungchan Kim, PhD, Kerri Akaya Smith, MD, Jeremy A. Mazurek, MD, Yuchi Han, MD, Anjali Vaidya, MD, Seyed Mehdi Nouraie, MD, PhD, Neil J. Kelly, MD, and Stephen Y. Chan, MD, PhD

**Table S1. PH, COPD and ALI patient demographics for plasma samples.**

| <b>Cohort</b>           | <b>Non-diseased Controls</b> | <b>Group 1 PAH</b> | <b>Group 2 PH</b> | <b>COPD</b> | <b>ALI</b> |
|-------------------------|------------------------------|--------------------|-------------------|-------------|------------|
| n                       | 56                           | 62                 | 16                | 39          | 39         |
| Age (Mean±SD, years)    | 47.4±17.6                    | 58.4±13.6          | 64.9±11.1         | 63.5±9.8    | 51.9±15.9  |
| Gender (n and % female) | 37(66.1%)                    | 48(77.4%)          | 9(56.3%)          | 14(35.9%)   | 18(46.2%)  |
| Race (n and % white)    | 38(67.9%)                    | 56(90.3%)          | 14(87.5%)         | 39(100%)    | 38(97.4%)  |

PH: pulmonary hypertension; PAH: pulmonary arterial hypertension; COPD: chronic obstructive pulmonary disease; ALI: acute lung injury.

**Table S2. Patient hemodynamic parameters by PH classification.** Hemodynamic parameters are shown as median with 25th and 75th (Q1-Q3) interquartile range. P-values were calculated by Mann-Whitney nonparametric test.

| <b>PH Group</b>  | <b>Group 1 PAH</b> | <b>Group 2 PH</b> | <b>P-Value</b> |
|------------------|--------------------|-------------------|----------------|
| n                | 62                 | 16                |                |
| mean PAP (mmHg)  | 42.0 (32.8-53.0)   | 42.5 (37.5-52.3)  | 0.521          |
| PCWP (mmHg)      | 10.0 (9.0-12.0)    | 22.5 (17.0-27.0)  | <0.001         |
| CO (Fick, L/min) | 5.3 (4.5-6.8)      | 5.8 (5.1-7.9)     | 0.193          |
| PVR (WU)         | 5.2 (3.8-7.1)      | 3.1 (1.9-4.4)     | <0.001         |

PH: pulmonary hypertension; PAH: pulmonary arterial hypertension; PAP: pulmonary artery pressure; PCWP: pulmonary capillary wedge pressure; CO: cardiac output; PVR: pulmonary vascular resistance; WU: Wood units.

**Table S3. Demographics and hemodynamic parameters of Group 1 PAH patients at time of blood draw.**

| <b>Etiology</b>          | <b>Age</b> | <b>Gender</b> | <b>Race</b> | <b>mean PAP (mmHg)</b> | <b>PVR (WU)</b> |
|--------------------------|------------|---------------|-------------|------------------------|-----------------|
| Idiopathic               | 39         | Female        | White       | 45                     | 3.8             |
| Portal hypertension      | 63         | Male          | White       | 56                     | 9.1             |
| Idiopathic               | 59         | Female        | White       | 36                     | 4               |
| Scleroderma              | 70         | Female        | White       | 44                     | 9.4             |
| Congenital heart disease | 40         | Male          | White       | 31                     | 5.2             |
| Scleroderma              | 72         | Female        | White       | 27                     | 5.2             |
| Scleroderma              | 73         | Female        | White       | 41                     | 6.4             |
| Scleroderma              | 65         | Female        | White       | 32                     | 3.8             |
| Idiopathic               | 57         | Male          | White       | 53                     | 9.1             |
| Idiopathic               | 26         | Female        | White       | 34                     | 5.4             |
| Scleroderma              | 73         | Female        | White       | 32                     | 3.8             |
| Scleroderma              | 37         | Male          | White       | 37                     | 3.4             |
| Dermatomyositis          | 68         | Male          | White       | 35                     | 5.3             |
| Idiopathic               | 43         | Female        | White       | 52                     | 11.2            |
| Idiopathic               | 36         | Female        | White       | 36                     | 7               |
| HIV                      | 48         | Male          | White       | 72                     | 16              |
| Scleroderma              | 71         | Female        | White       | 33                     | 4.8             |
| Idiopathic               | 53         | Male          | White       | 27                     | 4.7             |
| Idiopathic               | 67         | Male          | White       | 54                     | 6.6             |
| Scleroderma              | 64         | Female        | White       | 46                     | 6.6             |
| Scleroderma              | 72         | Female        | White       | 26                     | 2.5*            |
| Idiopathic               | 75         | Female        | White       | 42                     | 3.1             |
| Scleroderma              | 43         | Female        | Black       | 27                     | 2.7*            |
| Scleroderma              | 75         | Female        | White       | 51                     | 6.4             |
| Scleroderma              | 73         | Female        | White       | 57                     | 8.5             |
| Idiopathic               | 66         | Female        | White       | 54                     | 6.9             |
| Scleroderma              | 76         | Female        | Black       | 39                     | 3.2             |
| Idiopathic               | 70         | Female        | White       | 29                     | 4.3             |
| Idiopathic               | 76         | Female        | White       | 42                     | 11              |
| Scleroderma              | 86         | Female        | White       | 42                     | 8.4             |
| Congenital heart disease | 36         | Female        | White       | 58                     | 7.5             |
| Scleroderma              | 57         | Female        | White       | 27                     | 2.5*            |
| Systemic sclerosis       | 73         | Female        | White       | 38                     | 5               |
| Idiopathic               | 53         | Female        | White       | 56                     | 13              |
| Scleroderma              | 58         | Female        | White       | 53                     | 6.8             |
| Scleroderma              | 65         | Female        | White       | 47                     | 6.9             |
| Scleroderma              | 47         | Female        | White       | 32                     | 2.2*            |

|                           |    |        |       |     |      |
|---------------------------|----|--------|-------|-----|------|
| Idiopathic                | 27 | Female | White | 60  | 4.9  |
| Congenital heart disease  | 39 | Female | White | 40  | 4.2  |
| Connective tissue disease | 83 | Female | White | 41  | 5    |
| Idiopathic                | 58 | Female | White | 53  | 5.5  |
| Idiopathic                | 47 | Male   | White | 52  | 11.7 |
| Idiopathic                | 53 | Female | White | 54  | 5.1  |
| Connective tissue disease | 57 | Female | White | 65  | 5.7  |
| Idiopathic                | 73 | Female | White | 28  | 3.6  |
| Idiopathic                | 41 | Male   | White | 51  | 2.9* |
| Connective tissue disease | 61 | Female | White | 25  | 4.1  |
| Idiopathic                | 55 | Female | Black | 44  | 3.4  |
| Connective tissue disease | 58 | Female | White | 53  | 3.6  |
| Idiopathic                | 58 | Male   | White | 61  | 4.2  |
| Connective tissue disease | 58 | Male   | White | 43  | 3    |
| Idiopathic                | 55 | Female | White | 50  | 6.5  |
| Scleroderma               | 62 | Male   | White | 33  | 4.5  |
| Scleroderma               | 61 | Male   | White | 25  | 3.1  |
| Scleroderma               | 56 | Female | White | 38  | 5    |
| Scleroderma               | 51 | Female | Black | 39  | 9.2  |
| Idiopathic                | 59 | Female | White | 56  | 13.1 |
| Scleroderma               | 50 | Female | White | 23* | 1.5* |
| Idiopathic                | 71 | Female | White | 45  | 7.7  |
| Congenital heart disease  | 43 | Female | White | 53  | 5.6  |
| Connective tissue disease | 55 | Female | White | 52  | 7.5  |
| Idiopathic                | 63 | Female | White | 20* | 3.8  |

\*: The diagnosis was made based on prior invasive hemodynamics measurement, which fulfilled the criteria for Group 1 PAH.

PAP: pulmonary artery pressure; PVR: pulmonary vascular resistance; WU: Wood units.

**Table S4. Patient demographics for lung tissue donors.**

| <b>Cohort</b>           | <b>Non-diseased controls</b> | <b>PAH</b> | <b>COPD</b> |
|-------------------------|------------------------------|------------|-------------|
| n                       | 11                           | 8          | 20          |
| Age (Mean±SD, years)    | 46.6±12.8                    | 52.8±16.7  | 62.1±9.6    |
| Gender (n and % female) | 5(45.5%)                     | 7(87.5%)   | 8(40.0%)    |
| Race (n and % white)    | 8(72.7%)                     | 7(87.5%)   | 17(85.0%)   |

PAH: pulmonary arterial hypertension; COPD: chronic obstructive pulmonary disease.

**Table S5. CAD patient demographics for serum samples.**

| <b>Cohort</b>           | <b>Non-CAD controls</b> | <b>CAD</b> |
|-------------------------|-------------------------|------------|
| n                       | 22                      | 21         |
| Age (Mean±SD, years)    | 60.8±9.9                | 61.3±11.0  |
| Gender (n and % female) | 8 (26.7%)               | 6 (28.6%)  |
| Race (n and % white)    | 19 (86.4%)              | 20 (95.2%) |

CAD: coronary artery disease.

**Table S6. Patient demographics for heart tissue donors.**

| <b>Cohort</b>           | <b>Non-diseased controls</b> | <b>ICM</b> | <b>NICM</b> |
|-------------------------|------------------------------|------------|-------------|
| n                       | 12                           | 12         | 12          |
| Age (Mean±SD)           | 52.6±10.6                    | 61.4±8.3   | 49.3±10.0   |
| Gender (n and % female) | 2(16.7%)                     | 0(0.0%)    | 6(50.0%)    |
| Race (n and % white)    | 9(75.0%)                     | 11(91.7%)  | 8(66.7%)    |

ICM: ischemic cardiomyopathy; NICM: non-ischemic cardiomyopathy.



**Table S7. Summary of statistics for ROC analysis between PAH and a combined non-PAH cohort composed of control, COPD, and ALI subjects.**

|                                                    |             |
|----------------------------------------------------|-------------|
| AUC area (C-statistics)                            | 0.75        |
| Standard error                                     | 0.035       |
| 95% confidence interval                            | 0.681-0.817 |
| P value of AUC area                                | <0.001      |
| Sensitivity of optimal SCUBE1 cut point 5.46 ng/mL | 0.53        |
| 95% confidence interval                            | 0.45-0.61   |
| Sensitivity of optimal SCUBE1 cut point 5.46 ng/mL | 0.87        |
| 95% confidence interval                            | 0.77-0.93   |
| Likelihood ratio                                   | 4.11        |

**Table S8. Summary of statistics for ROC analysis between WSPH Group 1 PAH and Group 2 PH cohorts.**

|                                                    |             |
|----------------------------------------------------|-------------|
| AUC area (C-statistics)                            | 0.68        |
| Standard error                                     | 0.085       |
| 95% confidence interval                            | 0.515-0.846 |
| P value of AUC area                                | 0.027       |
| Sensitivity of optimal SCUBE1 cut point 5.01 ng/mL | 0.50        |
| 95% confidence interval                            | 0.28-0.72   |
| Sensitivity of optimal SCUBE1 cut point 5.01 ng/mL | 0.82        |
| 95% confidence interval                            | 0.71-0.90   |
| Likelihood ratio                                   | 2.82        |

Supplemental Figure S1: Efficacy of siRNA knockdown for BMPR2 and HIF1A genes.

Cultured PAECs were incubated with siRNA targeting BMPR2 or HIF1A, and control scrambled RNAs were used as controls. (A,B) BMPR2 (A) or HIF1A (B) mRNA expression levels were determined by RT-qPCR. The data were derived from 3 independent experiments. Data are presented as mean  $\pm$  SD. The p values were calculated by unpaired 2-sided *t*-test. AU: arbitrary units.

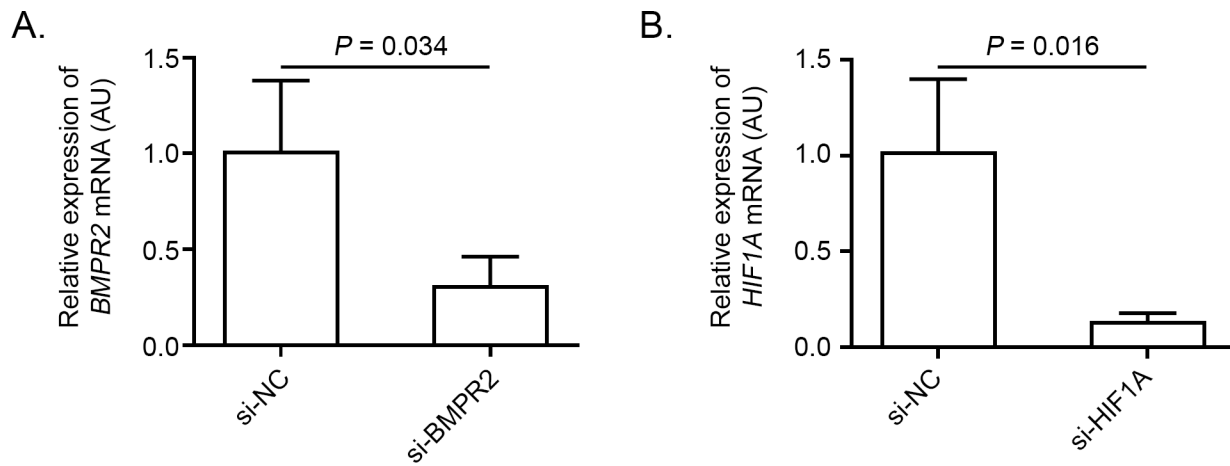

Supplemental Figure S2: Expression profile of major endothelial function regulating genes in PAECs treated with hypoxia or IL-1 $\beta$  exposure.

Cultured PAECs were treated with hypoxia or IL-1 $\beta$  for 48 hours and mRNA (N = 6 samples per group) were quantified by RT-qPCR. The relative change in mRNA expression of angiogenesis, proliferation and apoptosis-related genes *VEGF*, *NOS3*, *ANG*, *ANGPT1* (A–D), adhesion molecule genes *vWF* and *VECAMI* (E-F), and endothelial metabolism-related genes *PDK1*, *LDHA*, *CPT1* (G–I) were profiled. Data are presented as mean  $\pm$  SD. The p values were calculated by 1-way ANOVA with post hoc Bonferroni test. The comparisons with  $p > 0.05$  were not explicitly stated in the panels.

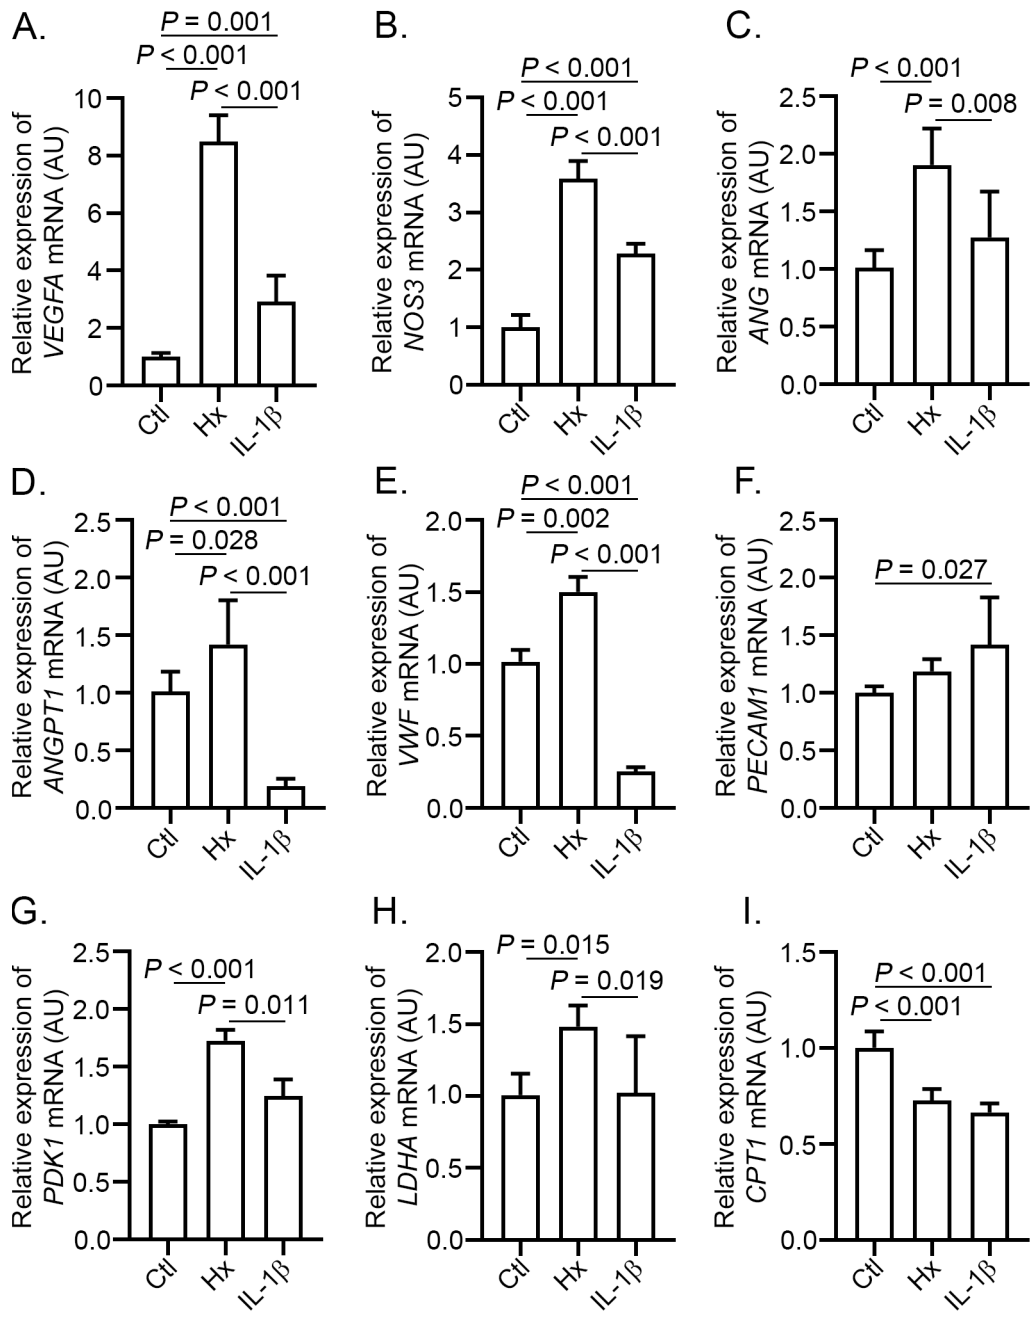

Supplemental Figure S3: Correlation analysis of plasma SCUBE1 with left and right heart filling pressure and cardiac output in WSPH Group 1 PAH patients.

(A,B) Plasma was collected from patients with WSPH Group 1 at the time of right heart catheterization (RHC). Plasma SCUBE1 levels were measured by ELISA. From 62 Group 1 PAH patients where these specific catheterization indices were available, no significant correlation was found between plasma SCUBE1 levels with pulmonary capillary wedge pressure (PWP; A) and with cardiac index (B). The p values were calculated from Spearman correlation (rho: correlation coefficient).

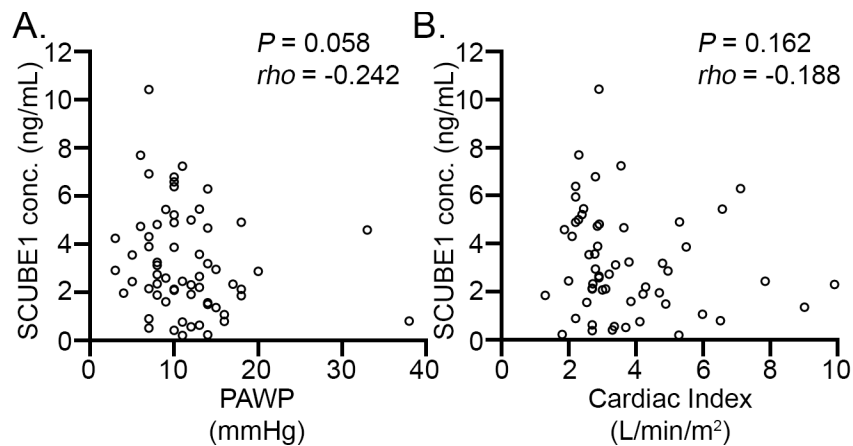

Supplement: mmc1.pdf [file mmc1.pdf]
